# Supplementary material for: Structural and mechanistic insights into enantioselectivity toward near-symmetric esters of a novel carboxylesteraseRoCE
Source: Royal Society of Chemistry journal article supplement (doi:10.1039/d2cy01542k), 2022-01-01
Supplement: d2cy01542k1.pdf [file d2cy01542k1.pdf]

## Supporting Information

### Structural and mechanistic insights into enantioselectivity toward near-symmetric esters of a novel carboxylesterase *RoCE*

Zhe Dou<sup>1</sup>, Peng Jia<sup>2</sup>, Xiaoyu Chen<sup>1</sup>, Zheng Wu<sup>1</sup>, Guochao Xu<sup>1,\*</sup>, Ye Ni<sup>1,\*</sup>

1. Key laboratory of industrial Biotechnology, Ministry of Education, School of Biotechnology, Jiangnan University, Wuxi 214122, Jiangsu, China
2. CAS Key Laboratory of Pathogenic Microbiology and Immunology, Institute of Microbiology, Chinese Academy of Sciences, Beijing 100101, China

|                                                                                                                                    |     |
|------------------------------------------------------------------------------------------------------------------------------------|-----|
| <b>Experimental</b> .....                                                                                                          | S2  |
| <b>Table S1</b> Data collection and refinement statistics of <i>RoCE</i> crystal. ....                                             | S14 |
| <b>Table S2</b> List of primers for site-directed mutagenesis. ....                                                                | S15 |
| <b>Table S3</b> Chiral GC analysis methods used in this study. ....                                                                | S16 |
| <b>Table S4</b> Enantioselective resolution of various esters with near-symmetric structure employing M144T. ....                  | S17 |
| <b>Fig. S1</b> GC spectra of racemic DMCPE (A) and the ( <i>R</i> )-DMCPE produced by recombinant <i>RoCE</i> (B). ....            | S18 |
| <b>Fig. S2</b> GC spectra of racemic ORCE (A) and the ( <i>R</i> )-ORCE synthesized by recombinant <i>RoCE</i> (B). ....           | S19 |
| <b>Fig. S3</b> GC spectra of racemic OTCE (A) and the ( <i>R</i> )-OTCE synthesized by recombinant <i>RoCE</i> (B). ....           | S20 |
| <b>Fig. S4</b> GC spectra of racemic THFCE (A) and the ( <i>R</i> )-THFCE synthesized by recombinant <i>RoCE</i> (B). ....         | S21 |
| <b>Fig. S5</b> GC spectra of racemic THPCE (A) and the ( <i>R</i> )-THPCE synthesized by recombinant <i>RoCE</i> (B). ....         | S22 |
| <b>Fig. S6</b> SDS-PAGE of <i>RoCE</i> purified by gel filtration chromatography. ....                                             | S23 |
| <b>Fig. S7</b> Enzyme characterization of purified <i>RoCE</i> . ....                                                              | S24 |
| <b>Fig. S8</b> Multiple sequence alignment of <i>RoCE</i> and homologous carboxylesterases from Family V. ....                     | S25 |
| <b>Fig. S9</b> Structural alignment and enlarged view of <i>RhEst1</i> and <i>RoCE</i> . ....                                      | S26 |
| <b>Fig. S10</b> IRC analysis of ( <i>S</i> )-THPCE (A) and ( <i>R</i> )-THPCE (B). ....                                            | S27 |
| <b>Fig. S11</b> Relative activity and <i>E</i> values of <i>RoCE</i> mutants with site-directed mutagenesis at M144 and V227. .... | S28 |
| <b>Fig. S12</b> Root-mean-square deviation of WT with DMCPE during the MD simulation. ....                                         | S29 |
| <b>Fig. S13</b> Root-mean-square deviation of WT with THPCE during the MD simulation. ....                                         | S30 |
| <b>Fig. S14</b> Root-mean-square deviation of M144T with THPCE during the MD simulation. ....                                      | S31 |
| <b>Fig. S15</b> Interaction analysis of WT with ( <i>R</i> )-DMCPE (A) and ( <i>S</i> )-DMCPE (B). ....                            | S32 |
| <b>Fig. S16</b> Interaction analysis of WT with ( <i>R</i> )-THPCE (A) and ( <i>S</i> )-THPCE (B). ....                            | S33 |
| <b>Fig. S17</b> Interaction analysis of M144T with ( <i>R</i> )-THPCE (A) and ( <i>S</i> )-THPCE (B). ....                         | S34 |

## Experimental

### 1. Activity assay

The activity of *RoCE* toward *p*-nitrophenol esters was spectrophotometrically assayed according to optical absorption changes of *p*-nitrophenol at 405 nm. A 200  $\mu$ L reaction mixture, including 10  $\mu$ L *p*-nitrophenyl acetate (pNPA) (0.5 mM), 10  $\mu$ L enzyme solution and 180  $\mu$ L PBS buffer (pH 7.0, 100 mM), was incubated at 30°C. The OD<sub>405</sub> of the reaction mixture was monitored for 3 min. One unit of activity (U) was defined as the amount of *RoCE* required to catalyze the formation of 1  $\mu$ mol of *p*-nitrophenol per minute.

### 2. Enzyme characterization

Influence of pH on activity of *RoCE* was evaluated using above mentioned method except for at different pH values ranging from 4.0 to 10.0, using sodium citrate buffer (pH 4.0–6.0, 100 mM), sodium phosphate buffer (pH 6.0–7.0, 100 mM), Tris-HCl buffer (pH 7.0–9.0, 100 mM) and glycine-NaOH buffer (pH 9.0–10.0, 100 mM).

Effect of temperature on activity of *RoCE* was measured by determining the relative activity toward pNPA at temperature ranges of 20–60°C in PBS buffer (pH 7.0, 100 mM).

The effects of metal ions (Cu<sup>2+</sup>, Al<sup>3+</sup>, Ag<sup>+</sup>, Mn<sup>2+</sup>, Ca<sup>2+</sup>, Ni<sup>2+</sup>, Co<sup>2+</sup>, Zn<sup>2+</sup>, Fe<sup>2+</sup>, and Mg<sup>2+</sup>) and EDTA on the activity of *RoCE* were explored in Tris-HCl buffer (pH 7.0, 100 mM) at 30°C. Appropriate amount of purified *RoCE* was incubated with various metal ions (1 mM) for indicated periods of time. Control experiment with addition of equal volume of Tris-HCl buffer at same incubation time was regarded as 100%. All activity assays were carried out in triplicate.

pNP esters containing acyl chains with different length including acetate, butyrate, caproate, caprylate, laurate, myristate and palmitate were used to determine the substrate specificity. All the activity assays were conducted using the above-mentioned method for at least three times.

### 3. Theozyme calculation

*Reaction complex of enzyme and (S)-THPCE*

|   |             |              |              |
|---|-------------|--------------|--------------|
| C | -3.59437400 | 149.16571100 | 107.61549200 |
| C | -3.44635300 | 150.68697200 | 107.80262300 |
| C | -4.07583200 | 151.11995600 | 109.12965400 |
| C | -3.33093800 | 150.44383400 | 110.29402800 |

|   |             |              |              |
|---|-------------|--------------|--------------|
| C | -3.49850200 | 148.46380000 | 108.99673500 |
| C | -2.90397900 | 147.07232800 | 108.89288100 |
| O | -3.55263300 | 146.35012400 | 107.99111300 |
| O | -1.98400200 | 146.64901200 | 109.57955700 |
| C | -3.01817500 | 145.03942800 | 107.67515200 |
| H | -4.56580800 | 148.92064800 | 107.17232900 |
| H | -2.82208400 | 148.77848400 | 106.94716800 |
| H | -2.38582000 | 150.95872700 | 107.80577700 |
| H | -4.03009300 | 152.20679200 | 109.25736300 |
| H | -2.49680100 | 151.05789900 | 110.63719800 |
| H | -4.01077500 | 150.25008300 | 111.13817600 |
| H | -4.51318100 | 148.32695100 | 109.41038800 |
| H | -3.28720800 | 144.35816600 | 108.48844100 |
| H | -1.93291200 | 145.11794200 | 107.61675800 |
| C | -0.82325700 | 143.12479800 | 109.83284900 |
| C | 0.50418100  | 143.84004100 | 109.99209700 |
| O | 1.58515400  | 143.24570500 | 109.91375200 |
| N | 0.41460000  | 145.17825700 | 110.19626200 |
| C | 1.60863600  | 145.99030600 | 110.31342400 |
| C | 1.44519100  | 147.38058100 | 110.91574600 |
| O | 2.48688100  | 147.95915800 | 111.27318600 |
| N | 0.22558500  | 147.93774100 | 111.01041300 |
| C | -0.05672500 | 149.21184000 | 111.69260300 |
| C | 0.06324300  | 149.30863900 | 107.66927200 |
| C | 0.24448200  | 147.86939900 | 107.22206400 |
| O | -0.94157600 | 147.39317200 | 106.60126600 |
| C | 0.07731100  | 140.39186200 | 107.50607700 |
| C | 0.45909000  | 141.05186900 | 106.16992900 |
| C | 0.43764700  | 142.54657400 | 106.21494000 |
| C | -0.28547100 | 143.49653200 | 105.52845500 |
| N | 1.25737000  | 143.27575500 | 107.06007600 |
| C | 0.98602000  | 144.59348600 | 106.87021900 |
| N | 0.06028700  | 144.77081700 | 105.94453300 |
| H | 0.98474300  | 149.68875700 | 108.12229200 |
| H | -0.19117100 | 149.94397200 | 106.81433300 |
| H | -0.73464400 | 149.38953400 | 108.41179900 |
| H | 1.09665900  | 147.79635200 | 106.52814000 |
| H | 0.48753300  | 147.25203700 | 108.10154300 |
| H | -0.95615200 | 140.63272300 | 107.77655300 |
| H | 0.16745900  | 139.30277300 | 107.43871300 |
| H | 0.72242800  | 140.73470000 | 108.32287200 |
| H | 1.45797500  | 140.70749400 | 105.86863900 |
| H | -0.22854300 | 140.72444400 | 105.38259800 |
| H | -1.13838500 | 149.31009900 | 111.64396900 |

|   |             |              |              |
|---|-------------|--------------|--------------|
| H | -0.58379700 | 147.52129500 | 110.55247400 |
| H | -0.48699100 | 145.61349200 | 110.02963900 |
| H | 2.33144500  | 145.46023900 | 110.93745000 |
| H | 2.10396400  | 146.13275900 | 109.34182200 |
| H | -1.66379300 | 143.70654300 | 110.21866200 |
| H | -0.99253300 | 142.92411600 | 108.76979900 |
| H | -0.76944300 | 142.16415600 | 110.34990100 |
| H | -1.02066100 | 143.33869300 | 104.75192600 |
| H | 1.48599200  | 145.37393900 | 107.42047300 |
| H | -0.71537900 | 146.53666100 | 106.17289700 |
| H | 1.78325800  | 142.92224200 | 107.85545100 |
| O | -2.71110400 | 149.20307400 | 109.90375900 |
| H | -3.90940200 | 151.21237000 | 106.96066700 |
| H | -5.13900700 | 150.84437100 | 109.13638000 |
| C | 0.39021000  | 149.20235800 | 113.16173300 |
| H | -0.09194000 | 148.37330700 | 113.68894400 |
| H | 1.47210000  | 149.09140700 | 113.25196700 |
| H | 0.08963100  | 150.14128200 | 113.63698500 |
| C | 0.49646000  | 150.45247100 | 110.96225400 |
| O | 1.79523700  | 150.44032500 | 110.65062100 |
| H | 2.20836200  | 149.57813200 | 110.93558800 |
| O | -0.20676900 | 151.41322100 | 110.73047400 |
| C | -3.61820900 | 144.61698800 | 106.35183500 |
| H | -3.31992700 | 145.31422700 | 105.56356100 |
| H | -3.25025300 | 143.62032200 | 106.08927000 |
| H | -4.71108000 | 144.58663300 | 106.40195000 |

*TSI of enzyme and (S)-THPCE*

|   |             |              |              |
|---|-------------|--------------|--------------|
| C | -3.58446800 | 148.95914900 | 107.31811100 |
| C | -3.62500600 | 150.49402400 | 107.41963700 |
| C | -3.93364300 | 150.91235500 | 108.85981000 |
| C | -2.82198000 | 150.39682700 | 109.79512700 |
| C | -2.94761800 | 148.35282100 | 108.58748600 |
| C | -2.15194500 | 147.05832100 | 108.35912800 |
| O | -2.99353600 | 146.19777600 | 107.61178000 |
| O | -1.52485000 | 146.55560200 | 109.35134400 |
| C | -3.36272700 | 144.97556900 | 108.23836000 |
| H | -4.59836300 | 148.55874200 | 107.20777200 |
| H | -3.01479300 | 148.64919000 | 106.44044800 |
| H | -2.65683700 | 150.91261200 | 107.12260300 |
| H | -4.01592100 | 152.00099900 | 108.95401200 |
| H | -2.05306900 | 151.15200900 | 109.96827600 |
| H | -3.24608900 | 150.10072300 | 110.76962500 |
| H | -3.74125400 | 148.04710900 | 109.29243700 |

|   |             |              |              |
|---|-------------|--------------|--------------|
| H | -3.67630800 | 145.15910300 | 109.27410900 |
| H | -2.51236300 | 144.28283300 | 108.27630200 |
| C | -1.45103600 | 143.01125600 | 110.84785800 |
| C | -0.06648900 | 143.59983400 | 110.66499000 |
| O | 0.87507200  | 142.93007900 | 110.21824800 |
| N | 0.07874800  | 144.89538500 | 111.03324300 |
| C | 1.33979900  | 145.58666900 | 110.80905200 |
| C | 1.35713100  | 147.04748600 | 111.24366100 |
| O | 2.43069700  | 147.51189600 | 111.66760400 |
| N | 0.22892400  | 147.76500300 | 111.10289800 |
| C | 0.08683300  | 149.16309800 | 111.53526800 |
| C | 0.16585400  | 149.52947100 | 107.03300800 |
| C | 0.13299900  | 148.07377900 | 107.46416600 |
| O | -1.09652000 | 147.42061600 | 107.10458500 |
| C | 0.69604300  | 140.71770300 | 105.94039600 |
| C | 1.42891500  | 142.01288100 | 105.55297800 |
| C | 0.78403400  | 143.24067100 | 106.11015100 |
| C | 0.21739100  | 144.33806100 | 105.50707700 |
| N | 0.63315100  | 143.45614600 | 107.47326700 |
| C | 0.00659200  | 144.62968800 | 107.66237500 |
| N | -0.25916800 | 145.18435100 | 106.48846800 |
| H | 1.14488700  | 149.96148500 | 107.26949000 |
| H | -0.00879800 | 149.61932600 | 105.95514700 |
| H | -0.59040700 | 150.09756600 | 107.57459500 |
| H | 0.94306200  | 147.51273200 | 106.97679500 |
| H | 0.27968700  | 147.98100300 | 108.54259300 |
| H | -0.33926600 | 140.73496800 | 105.58497700 |
| H | 1.19680100  | 139.84786500 | 105.50384800 |
| H | 0.67660300  | 140.58030800 | 107.02737300 |
| H | 2.47287200  | 141.95855000 | 105.88998400 |
| H | 1.46136300  | 142.11306900 | 104.46302200 |
| H | -0.95656100 | 149.40310000 | 111.35110200 |
| H | -0.52142700 | 147.41769700 | 110.47395700 |
| H | -0.76098600 | 145.45923800 | 111.08547800 |
| H | 2.13792000  | 145.08317200 | 111.35646000 |
| H | 1.61830400  | 145.55022500 | 109.74540700 |
| H | -2.21278700 | 143.76561700 | 111.05909200 |
| H | -1.72589100 | 142.46544400 | 109.94129100 |
| H | -1.42348300 | 142.29047100 | 111.67183600 |
| H | 0.12561800  | 144.56927400 | 104.45711200 |
| H | -0.29570400 | 145.08104400 | 108.59835000 |
| H | -0.76845000 | 146.28255500 | 106.60038400 |
| H | 0.92710900  | 142.87781900 | 108.26262200 |
| O | -2.10401300 | 149.28978800 | 109.23923500 |

|   |             |              |              |
|---|-------------|--------------|--------------|
| H | -4.37196100 | 150.90040200 | 106.72855500 |
| H | -4.90613000 | 150.49494400 | 109.15304500 |
| C | 0.39554900  | 149.35638900 | 113.02672500 |
| H | -0.24520000 | 148.69984900 | 113.62390500 |
| H | 1.43755100  | 149.12787700 | 113.25613800 |
| H | 0.18970500  | 150.39434300 | 113.30605500 |
| C | 0.88643000  | 150.16497100 | 110.67654400 |
| O | 2.18399500  | 149.89358300 | 110.49056300 |
| H | 2.43502100  | 149.06504300 | 110.98185300 |
| O | 0.37584300  | 151.16842200 | 110.22812500 |
| C | -4.49183000 | 144.37583600 | 107.41824200 |
| H | -4.16369600 | 144.19929400 | 106.38876800 |
| H | -4.81359900 | 143.42121000 | 107.84987200 |
| H | -5.35027900 | 145.05426500 | 107.39007400 |

*Intermediate and (S)-THPCE*

|   |             |              |              |
|---|-------------|--------------|--------------|
| C | -3.64159500 | 149.01305700 | 107.41001600 |
| C | -3.69296100 | 150.53958400 | 107.58512200 |
| C | -3.99014100 | 150.88133100 | 109.04762400 |
| C | -2.86338500 | 150.32629700 | 109.94300300 |
| C | -2.93258700 | 148.34989100 | 108.61122800 |
| C | -2.03718200 | 147.15356200 | 108.22110400 |
| O | -2.86581000 | 146.22552500 | 107.46386900 |
| O | -1.40943800 | 146.59134200 | 109.22974600 |
| C | -3.74487200 | 145.42530300 | 108.23700300 |
| H | -4.65885100 | 148.61021000 | 107.33026100 |
| H | -3.11545700 | 148.75130900 | 106.48976500 |
| H | -2.72992000 | 150.97801900 | 107.29986900 |
| H | -4.08149500 | 151.96295100 | 109.19825300 |
| H | -2.11564500 | 151.08887800 | 110.17136800 |
| H | -3.27822300 | 149.94878900 | 110.89337200 |
| H | -3.67680000 | 147.95050700 | 109.32025500 |
| H | -4.72731300 | 145.91547400 | 108.32706900 |
| H | -3.33515500 | 145.30029400 | 109.24561800 |
| C | -1.55233500 | 143.03720800 | 110.64429900 |
| C | -0.15128500 | 143.59743600 | 110.51272000 |
| O | 0.78682500  | 142.89946200 | 110.08766100 |
| N | 0.00425400  | 144.89197800 | 110.86049100 |
| C | 1.26968500  | 145.57497700 | 110.62813300 |
| C | 1.32563600  | 147.00416200 | 111.16049100 |
| O | 2.41281300  | 147.41937900 | 111.60275600 |
| N | 0.20802900  | 147.74340400 | 111.07403100 |
| C | 0.08669500  | 149.11053300 | 111.59516500 |
| C | 0.14989000  | 149.63020900 | 107.11770700 |

|   |             |              |              |
|---|-------------|--------------|--------------|
| C | 0.11224200  | 148.14424400 | 107.43810000 |
| O | -1.14415900 | 147.54102400 | 107.10439600 |
| C | 0.78323200  | 140.66030100 | 106.35101900 |
| C | 1.41878400  | 141.90685900 | 105.71307800 |
| C | 0.72044900  | 143.17154600 | 106.09557500 |
| C | 0.14195800  | 144.16657500 | 105.35075100 |
| N | 0.52820200  | 143.53867000 | 107.42199700 |
| C | -0.13698300 | 144.69768600 | 107.48532600 |
| N | -0.37561900 | 145.09157600 | 106.23739600 |
| H | 1.15468500  | 150.02510600 | 107.30757300 |
| H | -0.10390600 | 149.80669400 | 106.06631500 |
| H | -0.55169900 | 150.16796200 | 107.75608600 |
| H | 0.87528400  | 147.61147100 | 106.85151700 |
| H | 0.33135600  | 147.96606300 | 108.49199700 |
| H | -0.26264100 | 140.55534900 | 106.04507800 |
| H | 1.32393800  | 139.75910700 | 106.04677000 |
| H | 0.81191100  | 140.71300300 | 107.44509900 |
| H | 2.47541500  | 141.97047000 | 106.00535300 |
| H | 1.40326700  | 141.82443300 | 104.62143500 |
| H | -0.95651700 | 149.37369800 | 111.44489400 |
| H | -0.53777400 | 147.44100200 | 110.40694900 |
| H | -0.83160700 | 145.46947800 | 110.83735900 |
| H | 2.07465700  | 145.01919400 | 111.10935000 |
| H | 1.50261600  | 145.61145800 | 109.55352100 |
| H | -2.24450300 | 143.72348000 | 111.13766800 |
| H | -1.93779600 | 142.80727700 | 109.64516200 |
| H | -1.50606800 | 142.09907600 | 111.20421600 |
| H | 0.06253900  | 144.28187200 | 104.28189200 |
| H | -0.49339100 | 145.26870300 | 108.35669400 |
| H | -0.87615200 | 145.98889100 | 106.11079400 |
| H | 0.81518000  | 143.04428500 | 108.27906900 |
| O | -2.11720800 | 149.28641500 | 109.30709900 |
| H | -4.45033200 | 150.97406300 | 106.92274300 |
| H | -4.95579100 | 150.43968200 | 109.32800400 |
| C | 0.41987000  | 149.20842900 | 113.09087300 |
| H | -0.21752400 | 148.52041900 | 113.65537000 |
| H | 1.46296500  | 148.95760300 | 113.28998800 |
| H | 0.22711500  | 150.22834600 | 113.43806600 |
| C | 0.88503600  | 150.15184900 | 110.78571100 |
| O | 2.18091200  | 149.88173500 | 110.58073000 |
| H | 2.42558300  | 149.02236100 | 111.01962800 |
| O | 0.37779300  | 151.17879000 | 110.38956400 |
| C | -3.89853900 | 144.07618400 | 107.54930900 |
| H | -2.93550600 | 143.55418500 | 107.50479300 |

|   |             |              |              |
|---|-------------|--------------|--------------|
| H | -4.61353600 | 143.44316800 | 108.08759900 |
| H | -4.25718700 | 144.20576700 | 106.52272800 |

*Reaction complex of enzyme and (R)-THPCE*

|   |             |              |              |
|---|-------------|--------------|--------------|
| C | -4.50856900 | 147.37017700 | 106.96205500 |
| C | -3.83268600 | 148.72457000 | 107.15822800 |
| C | -3.80538800 | 149.08143100 | 108.64985500 |
| C | -3.89565100 | 146.59549600 | 109.10076900 |
| C | -3.21896400 | 145.47151800 | 109.86827000 |
| O | -2.61998300 | 144.56889300 | 109.10088600 |
| O | -3.21723400 | 145.45391000 | 111.08947100 |
| C | -1.85077900 | 143.53662900 | 109.78676000 |
| H | -4.47601800 | 147.04305000 | 105.91880800 |
| H | -2.80883300 | 148.66828800 | 106.76968000 |
| H | -3.22065000 | 149.98978600 | 108.82825500 |
| H | -4.83046600 | 149.28483500 | 108.99147300 |
| H | -4.94544400 | 146.62200000 | 109.44008200 |
| H | -2.50883100 | 143.04391200 | 110.50753900 |
| H | -1.03465900 | 144.02993700 | 110.31724100 |
| C | -0.54851300 | 144.66930300 | 113.10223400 |
| C | -0.10021900 | 146.11321300 | 112.96436200 |
| O | 1.01142300  | 146.48802700 | 113.33026400 |
| N | -1.02572500 | 146.96270900 | 112.42810300 |
| C | -0.80491400 | 148.38955200 | 112.36478400 |
| C | -0.33756100 | 148.97532700 | 111.03122600 |
| O | -0.45631100 | 150.18068300 | 110.81397200 |
| N | 0.24873700  | 148.12017900 | 110.15883800 |
| C | 0.94772300  | 148.63703200 | 108.99450400 |
| C | 3.27344900  | 145.92773700 | 110.15067700 |
| C | 2.19576600  | 144.94698200 | 110.59944000 |
| O | 0.88876600  | 145.32283700 | 110.15994400 |
| C | -1.28767300 | 146.13485100 | 103.17468800 |
| C | -1.41490300 | 146.83445100 | 104.53770900 |
| C | -0.43746200 | 146.34769600 | 105.55697400 |
| C | -0.60876800 | 145.74940600 | 106.78138100 |
| N | 0.93754900  | 146.44653400 | 105.40166400 |
| C | 1.52810600  | 145.91825200 | 106.50997200 |
| N | 0.61977300  | 145.48666500 | 107.36412200 |
| H | 2.42835500  | 143.92990200 | 110.24860200 |
| H | 2.15139700  | 144.93317500 | 111.69065900 |
| H | -1.42426200 | 145.05388600 | 103.27984000 |
| H | -2.03983700 | 146.51195100 | 102.47413300 |
| H | -0.30255500 | 146.30476900 | 102.72392300 |
| H | -1.31122500 | 147.92101400 | 104.40574300 |



|   |             |              |              |
|---|-------------|--------------|--------------|
| H | -2.41633400 | 146.66831800 | 104.94584900 |
| H | 1.51536600  | 147.78945200 | 108.59603400 |
| H | 0.41408600  | 147.14238200 | 110.41018500 |
| H | -1.90232100 | 146.57846900 | 112.09387800 |
| H | -1.71123300 | 148.93051600 | 112.65174600 |
| H | -0.02121900 | 148.62911300 | 113.09116500 |
| H | -1.56894900 | 144.50150300 | 112.75254900 |
| H | 0.13415000  | 144.03221000 | 112.53381000 |
| H | -0.46921100 | 144.38392800 | 114.15589600 |
| H | -1.53876100 | 145.51004600 | 107.27502100 |
| H | 2.59977100  | 145.87540900 | 106.64389000 |
| H | 0.84908300  | 145.26590900 | 109.17159700 |
| H | 1.41674700  | 146.85244600 | 104.61080400 |
| H | -5.56754800 | 147.42504300 | 107.26693200 |
| H | -4.36357800 | 149.49055900 | 106.57968600 |
| C | -3.21508300 | 147.92668600 | 109.46449200 |
| O | -3.85293100 | 146.34380100 | 107.70650400 |
| H | -2.14440800 | 147.83244600 | 109.26244100 |
| H | -3.33225700 | 148.10452200 | 110.53755600 |
| C | 1.99461800  | 149.69153000 | 109.36119200 |
| O | 2.35587600  | 150.58664000 | 108.63010700 |
| O | 2.56297600  | 149.46060000 | 110.56719000 |
| H | 3.21765100  | 150.17206900 | 110.69334100 |
| C | 0.02223500  | 149.16489200 | 107.89621200 |
| H | 3.32593000  | 145.98817500 | 109.05587500 |
| H | 3.07120800  | 146.92691900 | 110.54734600 |
| H | 4.25726900  | 145.60729300 | 110.51389700 |
| H | -0.58536400 | 149.98296900 | 108.28679100 |
| H | 0.61421700  | 149.53929000 | 107.05748500 |
| H | -0.62235000 | 148.35657700 | 107.54655900 |
| C | -1.33178400 | 142.58678200 | 108.72771400 |
| H | -0.65126300 | 143.10284000 | 108.04464800 |
| H | -0.77996100 | 141.77381500 | 109.21214000 |
| H | -2.15251400 | 142.15080100 | 108.14928500 |

*TSl of enzyme and (R)-THPCE*

|   |             |              |              |
|---|-------------|--------------|--------------|
| C | -3.45041200 | 148.21436800 | 106.27935300 |
| C | -3.19709800 | 149.70821200 | 106.46921100 |
| C | -3.25683500 | 150.05694400 | 107.96144400 |
| C | -2.59639200 | 147.66917800 | 108.42912600 |
| C | -1.63644800 | 146.71518600 | 109.16653300 |
| O | -1.77418300 | 145.36520000 | 108.69143000 |
| O | -1.59529800 | 146.86943400 | 110.42509500 |
| C | -2.84769000 | 144.63882000 | 109.28155500 |

|   |             |              |              |
|---|-------------|--------------|--------------|
| H | -3.32650800 | 147.91264600 | 105.23402500 |
| H | -2.20347600 | 149.94996000 | 106.07003300 |
| H | -2.99366900 | 151.10805600 | 108.12654600 |
| H | -4.28800900 | 149.92824400 | 108.32141900 |
| H | -3.60901600 | 147.41060700 | 108.78338500 |
| H | -3.81325600 | 145.06263000 | 108.96386100 |
| H | -2.79325200 | 144.71529100 | 110.37311300 |
| C | 0.30412000  | 143.79303000 | 111.37515700 |
| C | 0.63278600  | 144.71861500 | 112.54089200 |
| O | 1.51268800  | 144.44519100 | 113.35161400 |
| N | -0.15339300 | 145.83104500 | 112.61386500 |
| C | 0.02459700  | 146.81527100 | 113.66121300 |
| C | 0.37620800  | 148.23850000 | 113.21590700 |
| O | 0.96533400  | 148.99882000 | 113.98285200 |
| N | -0.02265900 | 148.62262400 | 111.97672200 |
| C | 0.18313100  | 149.99189300 | 111.53806000 |
| C | 2.12891700  | 147.45468900 | 108.76462400 |
| C | 0.93260200  | 146.60520600 | 109.15917200 |
| O | -0.22702100 | 147.05892500 | 108.44204600 |
| C | -0.99296400 | 141.94702200 | 104.03679400 |
| C | -1.30141200 | 143.42352200 | 103.73384200 |
| C | -0.63686300 | 144.36815600 | 104.68191900 |
| C | -1.12870800 | 145.15656800 | 105.68783800 |
| N | 0.74146400  | 144.56116000 | 104.71475900 |
| C | 1.03968300  | 145.43336900 | 105.70456000 |
| N | -0.07901300 | 145.80684100 | 106.29963900 |
| H | 1.09991200  | 145.54227600 | 108.93816700 |
| H | 0.73159700  | 146.70008500 | 110.22526500 |
| H | -1.31212100 | 141.68614200 | 105.05058400 |
| H | -1.51314800 | 141.29271000 | 103.33029900 |
| H | 0.07993800  | 141.73586100 | 103.95939600 |
| H | -1.01077200 | 143.66104600 | 102.70146800 |
| H | -2.38059900 | 143.59617500 | 103.79581000 |
| H | 0.03461600  | 149.98189800 | 110.45024800 |
| H | -0.60675500 | 148.02298700 | 111.38714800 |
| H | -0.81345200 | 146.01438400 | 111.85613200 |
| H | -0.88041000 | 146.88908200 | 114.28173900 |
| H | 0.83525600  | 146.46791000 | 114.30275200 |
| H | -0.25202300 | 142.92848300 | 111.75609000 |
| H | -0.28638400 | 144.27545400 | 110.59258300 |
| H | 1.24100400  | 143.41856300 | 110.95360700 |
| H | -2.13337100 | 145.32189400 | 106.03742500 |
| H | 2.03579900  | 145.76203800 | 105.95764900 |
| H | -0.19547600 | 146.48512600 | 107.31578700 |

|   |             |              |              |
|---|-------------|--------------|--------------|
| H | 1.41267900  | 144.12146400 | 104.10094400 |
| H | -4.48200900 | 147.96787100 | 106.58651900 |
| H | -3.93357300 | 150.28421600 | 105.89485100 |
| C | -2.31965400 | 149.13751100 | 108.75320400 |
| O | -2.53079700 | 147.42369100 | 107.02326900 |
| H | -1.27649700 | 149.34933500 | 108.49294600 |
| H | -2.43418000 | 149.28555600 | 109.83056900 |
| C | 1.62602600  | 150.44946100 | 111.74534300 |
| O | 1.96016000  | 151.57169200 | 112.04918100 |
| O | 2.52342700  | 149.48394000 | 111.42574400 |
| H | 3.39777700  | 149.87776700 | 111.60118600 |
| C | -0.79534700 | 150.98136600 | 112.17450500 |
| H | 2.32245300  | 147.41201600 | 107.68470100 |
| H | 1.96921400  | 148.49812700 | 109.04471700 |
| H | 3.02380100  | 147.10277800 | 109.28888500 |
| H | -0.65919600 | 150.98339900 | 113.25799600 |
| H | -0.61910700 | 151.99283300 | 111.80001200 |
| H | -1.82233100 | 150.68315200 | 111.94085300 |
| C | -2.72969800 | 143.19404900 | 108.82596700 |
| H | -1.78002000 | 142.76377100 | 109.15963500 |
| H | -3.54772000 | 142.59326700 | 109.23850100 |
| H | -2.76829600 | 143.12778700 | 107.73275300 |

*Intermediate and (R)-THPCE*

|   |             |              |              |
|---|-------------|--------------|--------------|
| C | -3.48386300 | 148.22934400 | 106.30915700 |
| C | -3.31592300 | 149.72903100 | 106.54259700 |
| C | -3.38383500 | 150.02859800 | 108.04500500 |
| C | -2.58646200 | 147.66780500 | 108.44223200 |
| C | -1.56319500 | 146.75237500 | 109.15351200 |
| O | -1.67513900 | 145.39074200 | 108.63323700 |
| O | -1.60332600 | 146.84824400 | 110.43324700 |
| C | -2.75280400 | 144.63733300 | 109.16778800 |
| H | -3.35363100 | 147.96854100 | 105.25294900 |
| H | -2.34093800 | 150.03991600 | 106.14500700 |
| H | -3.18008400 | 151.08790000 | 108.23969500 |
| H | -4.40314300 | 149.83002800 | 108.40698800 |
| H | -3.58147200 | 147.34446400 | 108.78778300 |
| H | -3.71569400 | 145.03066600 | 108.80253900 |
| H | -2.75661600 | 144.71742900 | 110.26049500 |
| C | 0.32324400  | 143.78096600 | 111.37105000 |
| C | 0.61690500  | 144.70018900 | 112.55164500 |
| O | 1.47164600  | 144.41945700 | 113.38758800 |
| N | -0.16830900 | 145.81242200 | 112.60244900 |
| C | -0.01594300 | 146.79801700 | 113.65270000 |

|   |             |              |              |
|---|-------------|--------------|--------------|
| C | 0.34008200  | 148.22009500 | 113.20661500 |
| O | 0.93395800  | 148.98018900 | 113.97141600 |
| N | -0.06058500 | 148.60094000 | 111.96814600 |
| C | 0.16016600  | 149.96389100 | 111.52020700 |
| C | 2.13200500  | 147.44124000 | 108.73311400 |
| C | 0.92291700  | 146.63838900 | 109.18267800 |
| O | -0.23893000 | 147.15519800 | 108.52063600 |
| C | -1.10300300 | 141.93207500 | 104.22297700 |
| C | -1.33161000 | 143.39235300 | 103.79500200 |
| C | -0.67696800 | 144.37520900 | 104.71004800 |
| C | -1.18622200 | 145.22188200 | 105.65629000 |
| N | 0.70586900  | 144.53447100 | 104.78429200 |
| C | 1.00344700  | 145.44085900 | 105.73623100 |
| N | -0.13278300 | 145.86768500 | 106.26274100 |
| H | 1.03661000  | 145.57109800 | 108.94392300 |
| H | 0.79041900  | 146.72622200 | 110.26081400 |
| H | -1.48608500 | 141.76159200 | 105.23379400 |
| H | -1.61408300 | 141.24853200 | 103.53824100 |
| H | -0.03781200 | 141.67368100 | 104.22034800 |
| H | -0.97569800 | 143.54328400 | 102.76718300 |
| H | -2.40364700 | 143.61244600 | 103.78455800 |
| H | 0.01377700  | 149.94655900 | 110.43221100 |
| H | -0.64176600 | 147.99532700 | 111.37407400 |
| H | -0.80533300 | 146.00250400 | 111.82295100 |
| H | -0.93531700 | 146.87048100 | 114.25221800 |
| H | 0.78164700  | 146.45588400 | 114.31304100 |
| H | -0.23171700 | 142.90716600 | 111.73203000 |
| H | -0.25508800 | 144.26607400 | 110.58121100 |
| H | 1.27318300  | 143.42003300 | 110.96660100 |
| H | -2.19124800 | 145.43219100 | 105.97861500 |
| H | 1.99454100  | 145.75664000 | 106.02041500 |
| H | -0.23265900 | 146.50848700 | 107.13691800 |
| H | 1.38471700  | 144.04658700 | 104.21650500 |
| H | -4.49698200 | 147.91497600 | 106.61560500 |
| H | -4.08878200 | 150.27770500 | 105.98946300 |
| C | -2.38947400 | 149.14019600 | 108.80104300 |
| O | -2.51450200 | 147.46974200 | 107.02241300 |
| H | -1.36261700 | 149.41782600 | 108.53717500 |
| H | -2.49921500 | 149.24982500 | 109.88330200 |
| C | 1.60666500  | 150.40909900 | 111.72694800 |
| O | 1.95325600  | 151.52935000 | 112.02484600 |
| O | 2.49627500  | 149.43339900 | 111.41284400 |
| H | 3.37327800  | 149.82016900 | 111.59049800 |
| C | -0.80906100 | 150.96844900 | 112.14739300 |

|   |             |              |              |
|---|-------------|--------------|--------------|
| H | 2.25796900  | 147.41899800 | 107.64154000 |
| H | 2.03799300  | 148.48399100 | 109.04343300 |
| H | 3.04079200  | 147.03692400 | 109.19177900 |
| H | -0.67446000 | 150.97672800 | 113.23107900 |
| H | -0.62244700 | 151.97552100 | 111.76583100 |
| H | -1.83842900 | 150.67838100 | 111.91436800 |
| C | -2.57786700 | 143.19318800 | 108.72400000 |
| H | -1.63402200 | 142.78744700 | 109.10209100 |
| H | -3.39834100 | 142.57162800 | 109.09969900 |
| H | -2.56466200 | 143.12134200 | 107.62965200 |

**Table S1** Data collection and refinement statistics of *RoCE* crystal.

| Item                                   | <i>RoCE</i>                 |
|----------------------------------------|-----------------------------|
| <b>Data collection</b>                 |                             |
| Space group                            | P 21 21 21                  |
| Cell dimensions                        | 48.68 Å, 90.47 Å, 131.36 Å, |
| a, b, c, $\alpha$ , $\beta$ , $\gamma$ | 90°, 90°, 90°,              |
| Resolution range (Å)                   | 37.25 - 1.78                |
| Unique reflections                     | 55437                       |
| Redundancy                             | 1.0                         |
| Completeness (%)                       | 98.5 (37.25-1.78)           |
| Average $I/\sigma(I)$ <sup>a</sup>     | 3.85 (at 1.78Å)             |
| Wilson B-factor                        | 19.4                        |
| CC 1/2                                 | 0.994                       |
| <b>Refinement</b>                      |                             |
| No. of reflections                     | 52737                       |
| Rwork (95% data)                       | 0.170                       |
| Rfree (5% data) <sup>b</sup>           | 0.197                       |
| Protein (aa)                           | 273                         |
| Average B factors (Å <sup>2</sup> )    | 22.0                        |
| <b>RMSD</b>                            |                             |
| Rmsd bonds (Å)                         | 0.013                       |
| Rmsd angles (°)                        | 1.789                       |
| Ramachandran plot favored (%)          | 98                          |
| Ramachandran plot outliers (%)         | 0                           |
| <b>PDB ID code</b>                     | 7YII                        |

<sup>a</sup> Parentheses indicate highest-resolution shells.

<sup>b</sup>  $R_{\text{free}}$  calculated using 5% of reflections that were randomly selected during refinement.

**Table S2** List of primers for site-directed mutagenesis.

| Primer              | Sequence (5'-3')            |
|---------------------|-----------------------------|
| <i>RoCE-M144S-F</i> | GGTAAAGTTGGTGCAGCAAGCCGTGCC |
| <i>RoCE-M144S-R</i> | GCCCGGAATTGCGGCACGGCTTGCTGC |
| <i>RoCE-M144T-F</i> | GGTAAAGTTGGTGCAGCAACCCGTGCC |
| <i>RoCE-M144T-R</i> | GCCCGGAATTGCGGCACGGGTTGCTGC |
| <i>RoCE-M144Y-F</i> | GGTAAAGTTGGTGCAGCATATCGTGCC |
| <i>RoCE-M144Y-R</i> | GCCCGGAATTGCGGCACGATATGCTGC |
| <i>RoCE-M144C-F</i> | GGTAAAGTTGGTGCAGCATGTCGTGCC |
| <i>RoCE-M144C-R</i> | GCCCGGAATTGCGGCACGACATGCTGC |
| <i>RoCE-M144N-F</i> | GGTAAAGTTGGTGCAGCAAATCGTGCC |
| <i>RoCE-M144N-R</i> | GCCCGGAATTGCGGCACGATTTGCTGC |
| <i>RoCE-M144Q-F</i> | GGTAAAGTTGGTGCAGCACAGCGTGCC |
| <i>RoCE-M144Q-R</i> | GCCCGGAATTGCGGCACGCTGTGCTGC |
| <i>RoCE-M144G-F</i> | GGTAAAGTTGGTGCAGCAGGTCGTGCC |
| <i>RoCE-M144G-R</i> | GCCCGGAATTGCGGCACGACCTGCTGC |
| <i>RoCE-V227S-F</i> | CATGGCACCGAGGATAGCAGCGTGGAT |
| <i>RoCE-V227S-R</i> | ACCGGCGCTCACATCCACGCTGCTATC |
| <i>RoCE-V227T-F</i> | CATGGCACCGAGGATAGCACCGTGGAT |
| <i>RoCE-V227T-R</i> | ACCGGCGCTCACATCCACGGTGCTATC |
| <i>RoCE-V227Y-F</i> | CATGGCACCGAGGATAGCTATGTGGAT |
| <i>RoCE-V227Y-R</i> | ACCGGCGCTCACATCCACATAGCTATC |
| <i>RoCE-V227C-F</i> | CATGGCACCGAGGATAGCTGTGTGGAT |
| <i>RoCE-V227C-R</i> | ACCGGCGCTCACATCCACACAGCTATC |
| <i>RoCE-V227N-F</i> | CATGGCACCGAGGATAGCAATGTGGAT |
| <i>RoCE-V227N-R</i> | ACCGGCGCTCACATCCACATTGCTATC |
| <i>RoCE-V227Q-F</i> | CATGGCACCGAGGATAGCCAGGTGGAT |
| <i>RoCE-V227Q-R</i> | ACCGGCGCTCACATCCACCTGGCTATC |
| <i>RoCE-V227G-F</i> | CATGGCACCGAGGATAGCGGTGTGGAT |
| <i>RoCE-V227G-R</i> | ACCGGCGCTCACATCCACACCGCTATC |

**Table S3** Chiral GC analysis methods used in this study.

| Entry | Substrate                                                                         | Conditions                                                                                                                                                                 | ( <i>R</i> )-ester | ( <i>S</i> )-ester |
|-------|-----------------------------------------------------------------------------------|----------------------------------------------------------------------------------------------------------------------------------------------------------------------------|--------------------|--------------------|
| 1     | 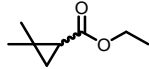 | <b>Injector:</b> 280°C, <b>Detector:</b> 280°C<br><b>Column:</b> 60°C for 3 min, 5°C/min to 120°C and kept for 1 min, 10°C/min to 160°C                                    | 9.24 min           | 8.97 min           |
| 2     |  | <b>Injector:</b> 280°C, <b>Detector:</b> 280°C<br><b>Column:</b> 80°C for 3.5 min, 5°C/min to 98°C                                                                         | 5.91 min           | 5.50 min           |
| 3     |  | <b>Injector:</b> 280°C, <b>Detector:</b> 280°C<br><b>Column:</b> 100°C for 5 min, 10°C/min to 120°C                                                                        | 5.69 min           | 5.38 min           |
| 4     |  | <b>Injector:</b> 280°C, <b>Detector:</b> 280°C<br><b>Column:</b> 100°C for 5 min, 10°C/min to 132°C                                                                        | 7.18 min           | 6.92 min           |
| 5     |  | <b>Injector:</b> 280°C, <b>Detector:</b> 280°C<br><b>Column:</b> 35°C for 5 min, 4°C/min to 60°C, 5°C/min to 100°C, 8°C/min to 120°C, 10°C/min to 160°C, 20°C/min to 165°C | 24.5 min           | 24.7 min           |

Note: Chiral GC was performed using GC2014 (SHIMADZU Co. Ltd) equipped with CP-Chirasil-Dex CB.



**Table S4** Enantioselective resolution of various esters with near-symmetric structure employing M144T.

| Substrate                                                                               | Specific activity<br>/U·mg <sup>-1</sup> | Conv. /% | <i>ee</i> <sub>s</sub><br>/% | <i>E</i> value |
|-----------------------------------------------------------------------------------------|------------------------------------------|----------|------------------------------|----------------|
| DMCPE  | 3.43±0.05                                | 51.1     | >99.9                        | >200           |
| ORCE   | 36.7±0.3                                 | 89.2     | 96.5                         | 3.6            |
| OTCE   | 32.4±0.5                                 | 81.1     | 96.6                         | 5.1            |
| THFCE  | 80.6±0.8                                 | 69.8     | 96.8                         | 8.9            |
| THPCE  | 37.2±0.5                                 | 62.6     | 97.3                         | 15.1           |

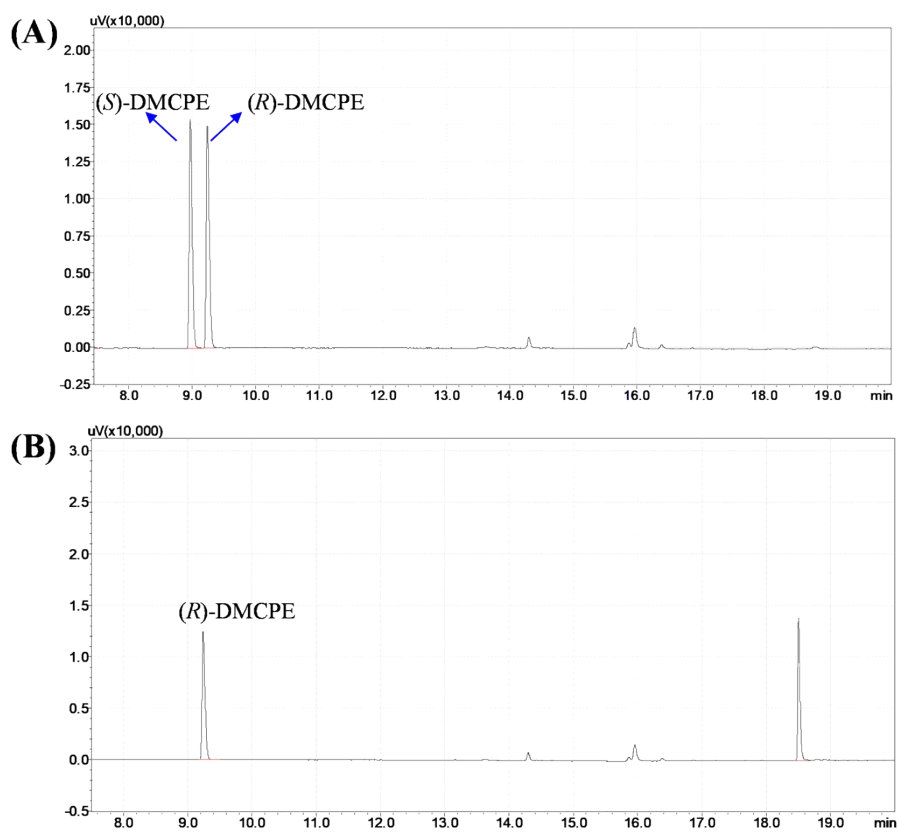

**Fig. S1** GC spectra of racemic DMCPE (A) and the (R)-DMCPE produced by recombinant RoCE (B).

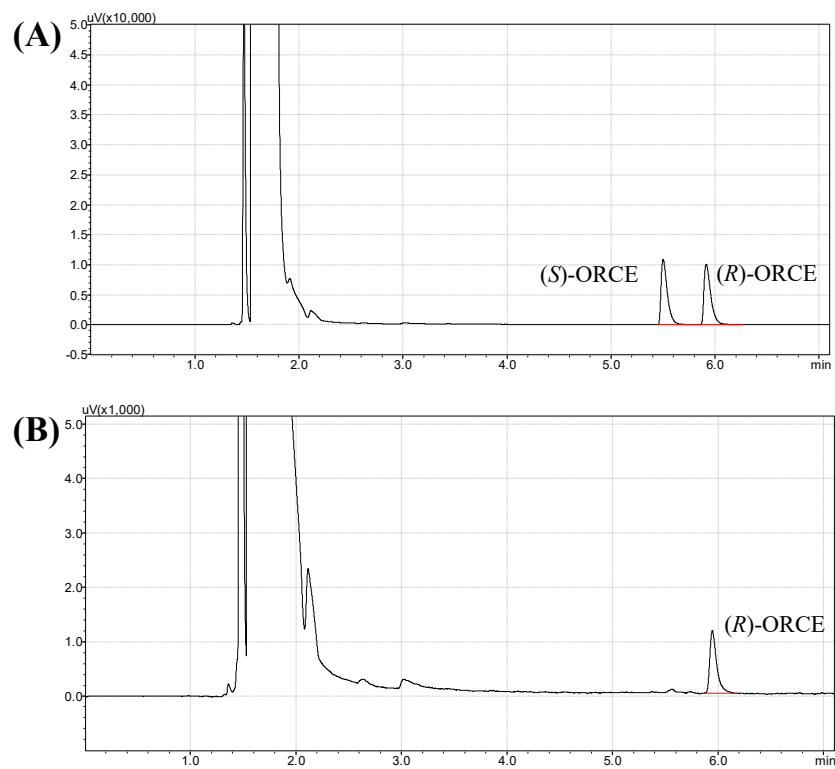

**Fig. S2** GC spectra of racemic ORCE (A) and the (R)-ORCE synthesized by recombinant *RoCE* (B).

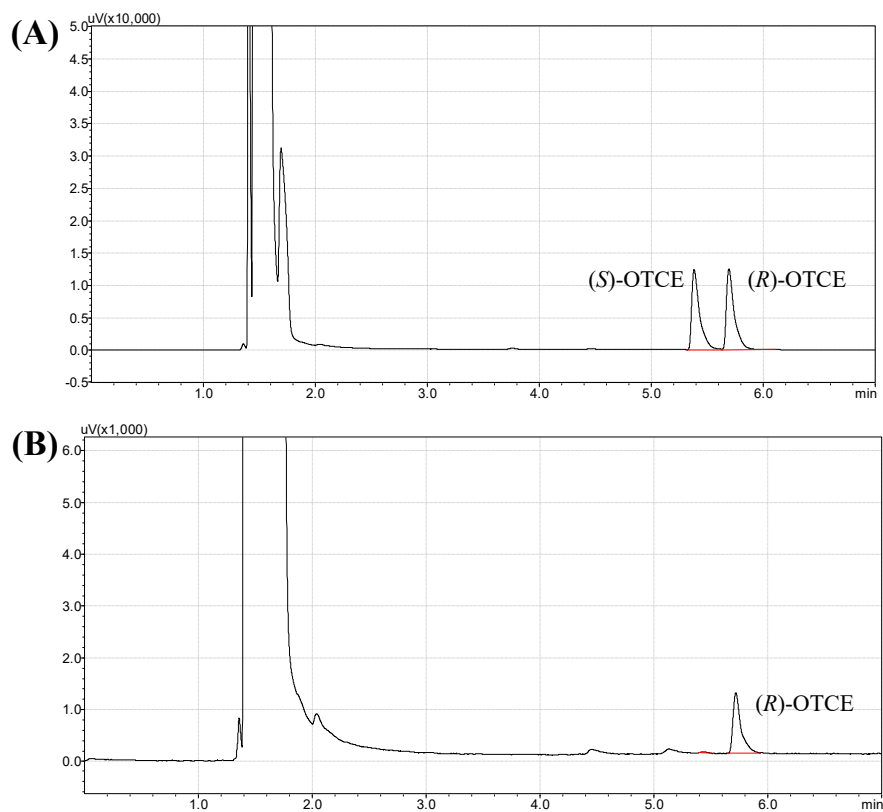

**Fig. S3** GC spectra of racemic OTCE (A) and the (R)-OTCE synthesized by recombinant RoCE (B).

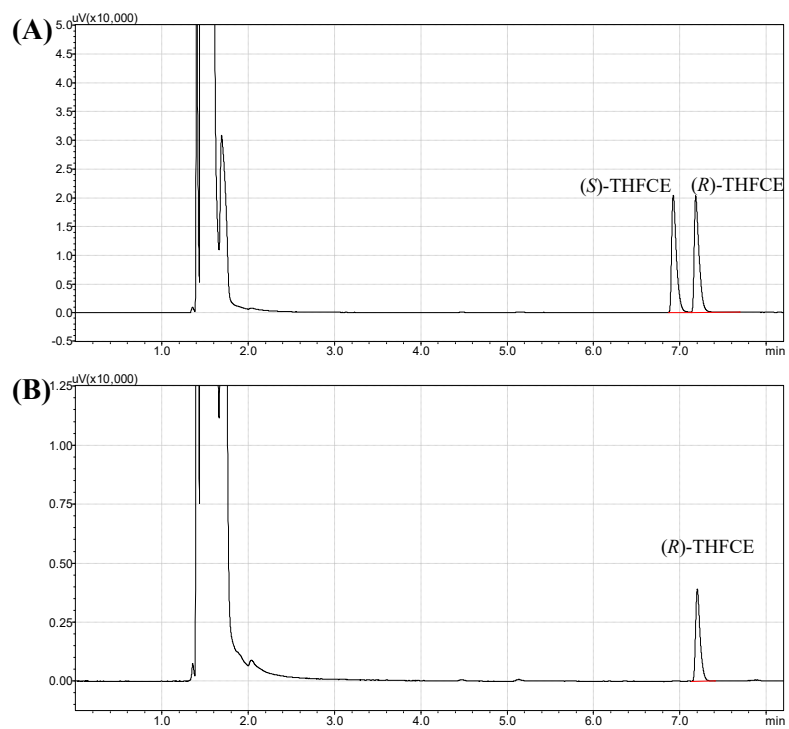

**Fig. S4** GC spectra of racemic THFCE (A) and the (*R*)-THFCE synthesized by recombinant *RoCE* (B).

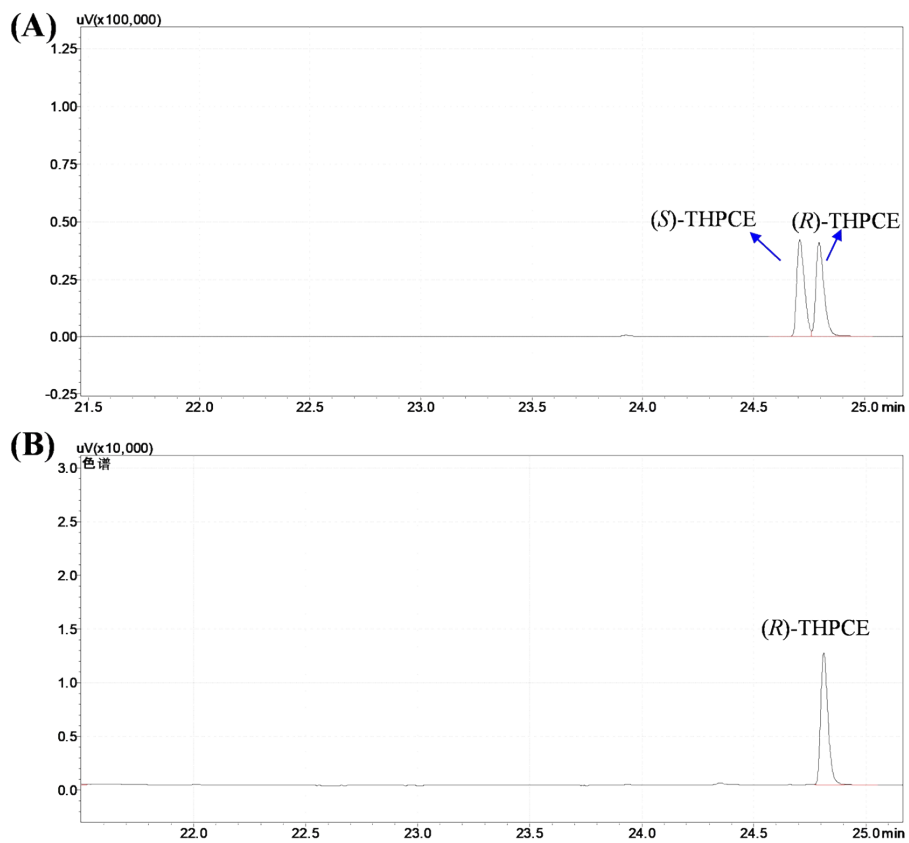

**Fig. S5** GC spectra of racemic THPCE (A) and the  $(R)$ -THPCE synthesized by recombinant  $RoCE$  (B).

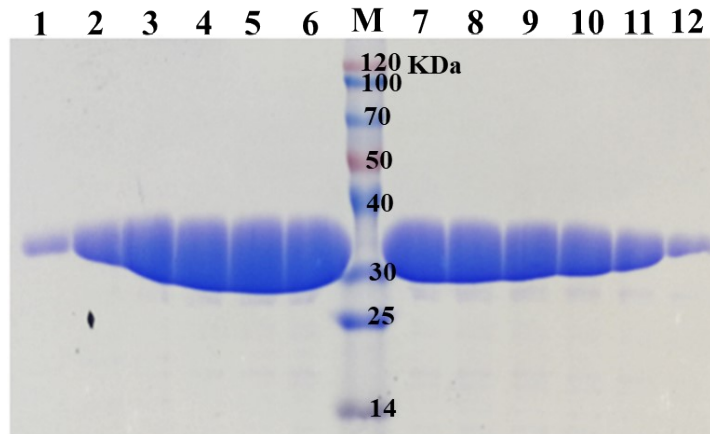

**Fig. S6** SDS-PAGE of *RoCE* purified by gel filtration chromatography. Lane M: protein marker, Lanes 1-12: The serial number of the eluents from gel filtration chromatography.

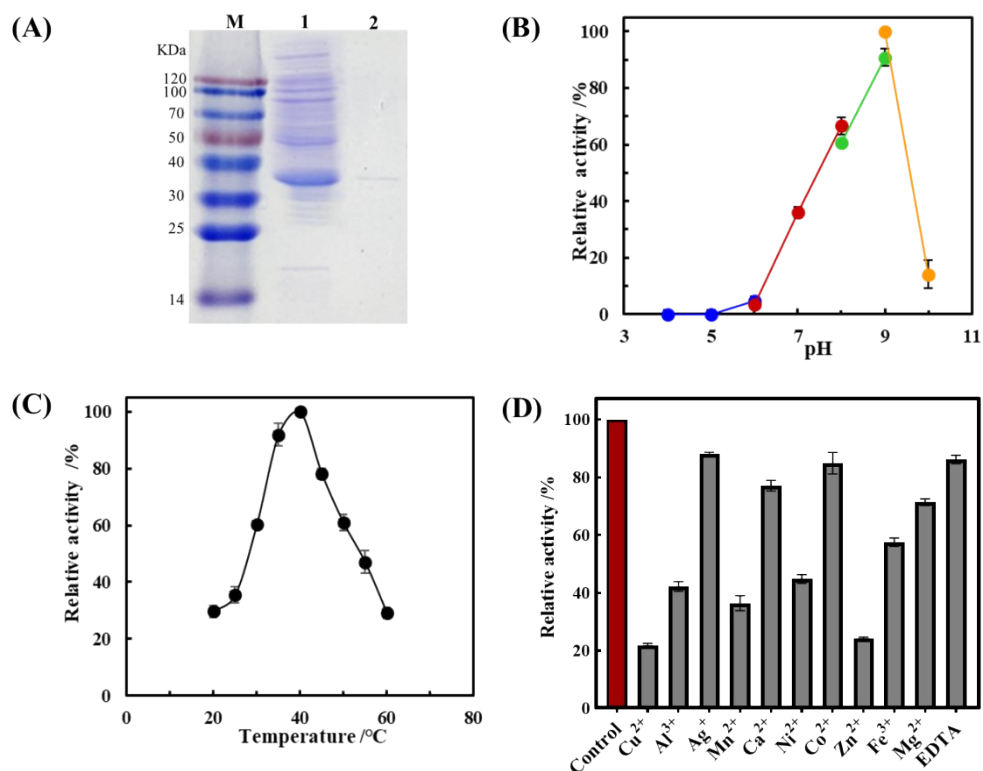

**Fig. S7** Enzyme characterization of purified *RoCE*.

(A) SDS-PAGE analysis of *RoCE*. Lane M, protein molecular marker; Lanes 1 & 2, supernatant and precipitant of *E. coli* BL21(DE3)/pET28-*RoCE*; (B) pH-activity profile of purified *RoCE* toward p-nitrophenyl acetate (pNPA), (●): sodium citrate buffer (pH 4.0–6.0), (●): sodium phosphate buffer (pH 6.0–7.0), (●): Tris-HCl buffer (pH 7.0–9.0), (●): Glycine-NaOH buffer (pH 9.0–10.0); (C) Temperature-activity profile of purified *RoCE*; (D) Effect of metal ions on the activity of *RoCE*.



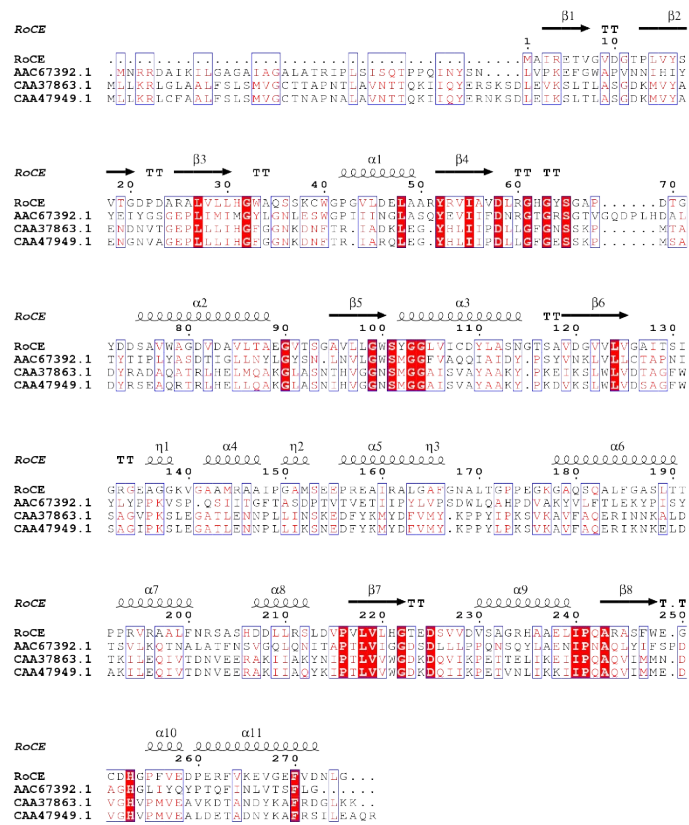

Fig. S8 Multiple sequence alignment of RoCE and homologous carboxylesterases from Family V.

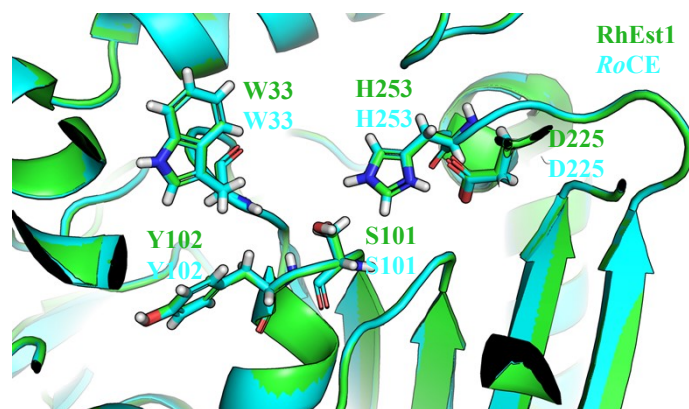

**Fig. S9** Structural alignment and enlarged view of *RhEst1* and *RoCE*. Oxyanion hole residues and catalytic triad were illustrated in stick. Green: *RhEst1*, Blue: *RoCE*.

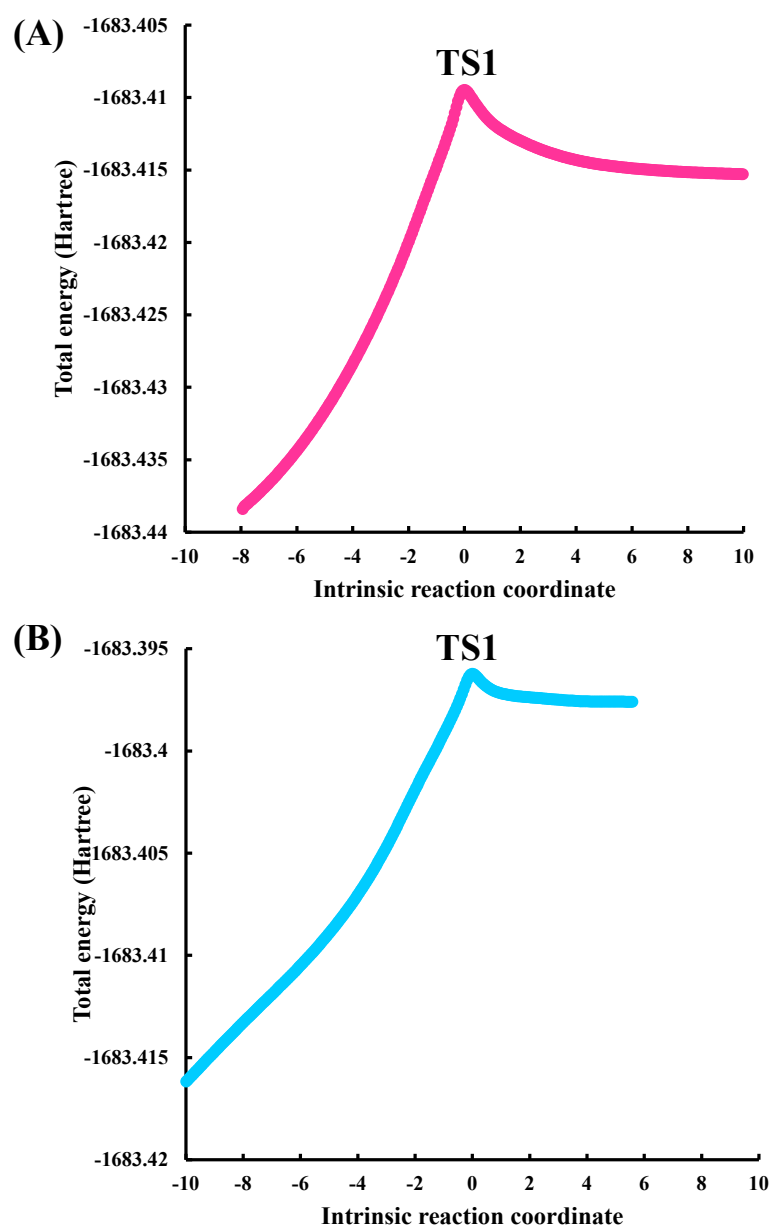

Fig. S10 IRC analysis of (*S*)-THPCE (A) and (*R*)-THPCE (B).

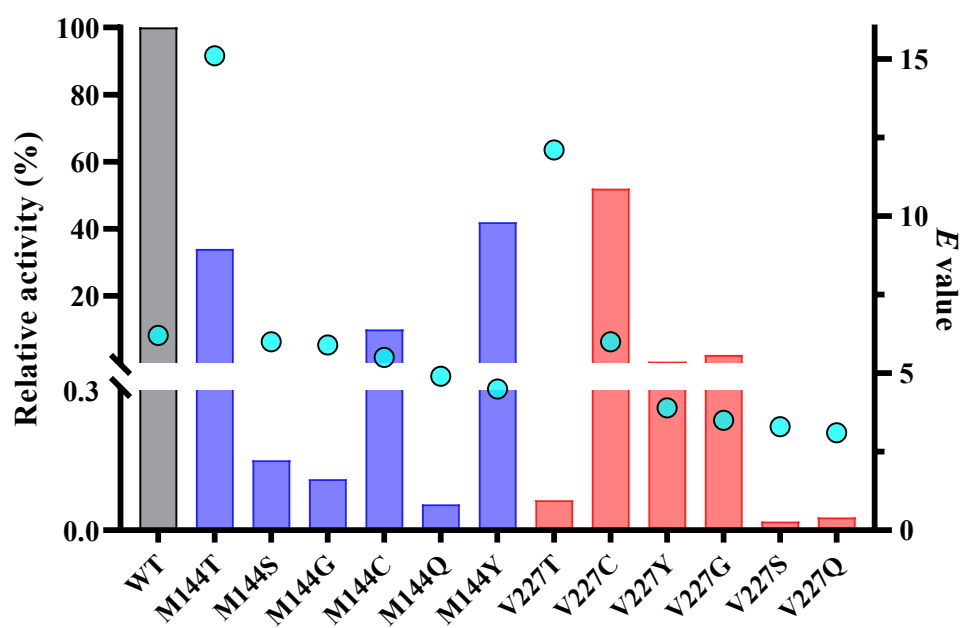

**Fig. S11** Relative activity and *E* values of *RoCE* mutants with site-directed mutagenesis at M144 and V227.  
 Column: relative activity of WT (grey), M144 mutants (blue) and V227 mutants (red). Filled cycle: *E* values.

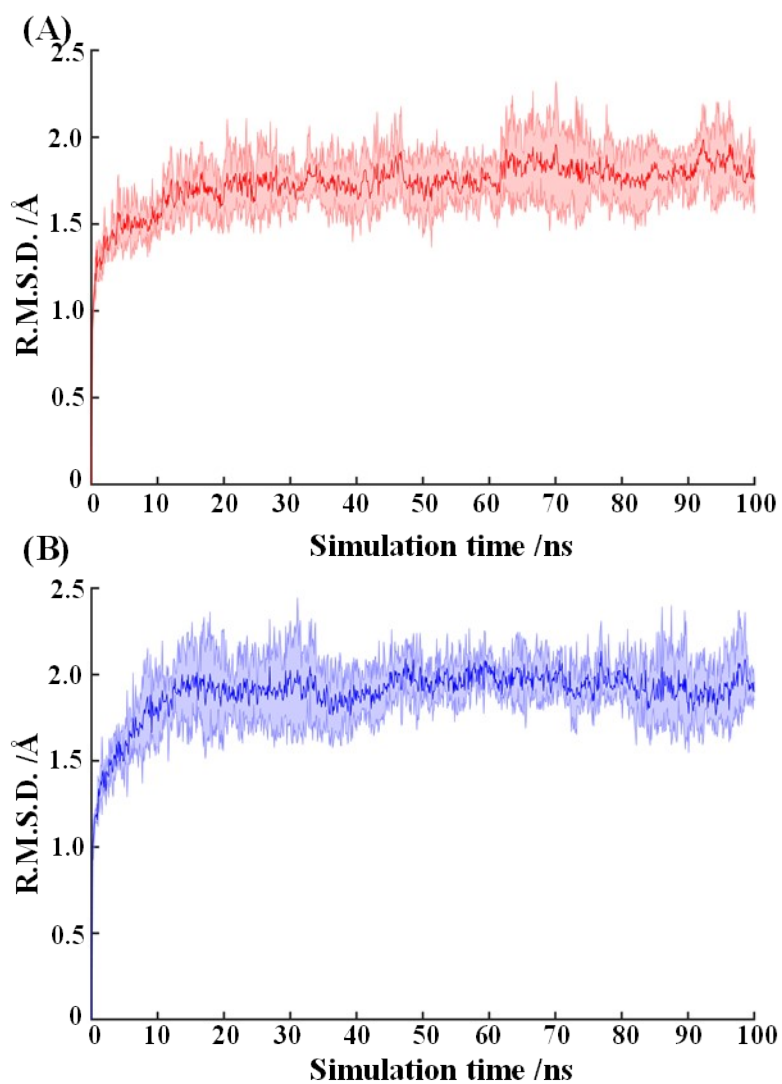

**Fig. S12** Root-mean-square deviation of WT with DMCPE during the MD simulation. (A) WT in complex with (*S*)-DMCPE, (B) WT in complex with (*R*)-DMCPE.

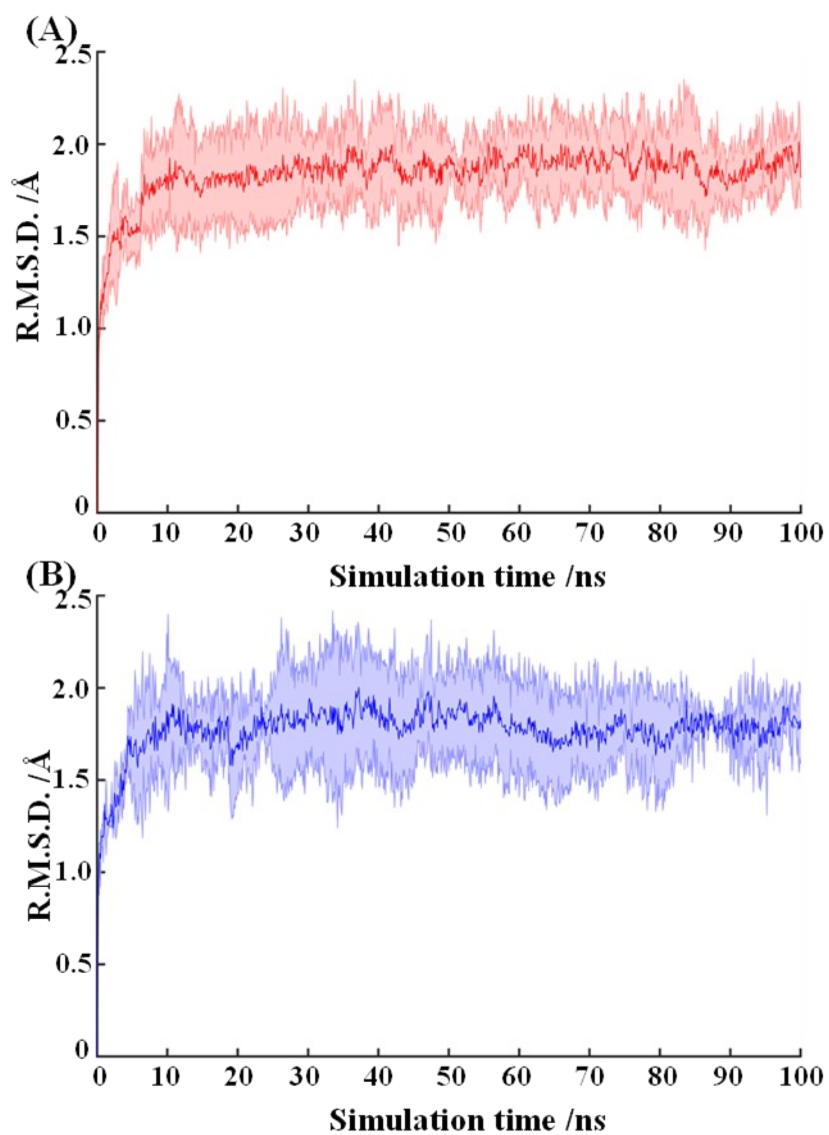

**Fig. S13** Root-mean-square deviation of WT with THPCE during the MD simulation.  
(A) WT in complex with (*S*)-THPCE, (B) WT in complex with (*R*)-THPCE.

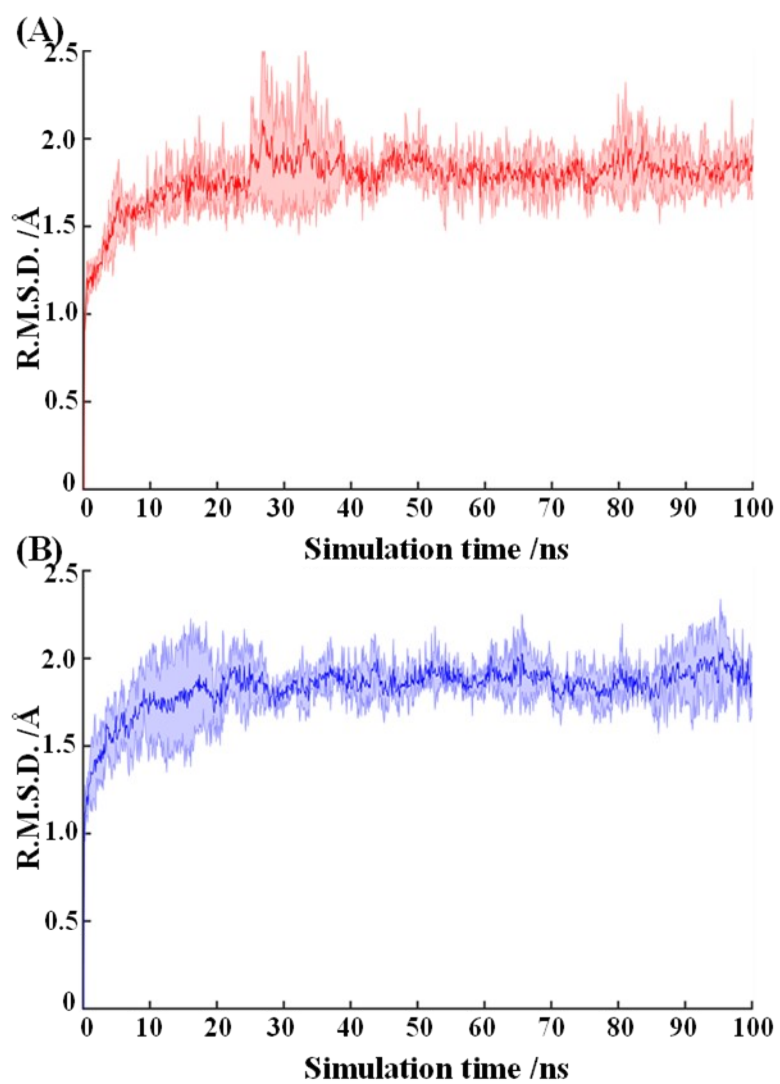

**Fig. S14** Root-mean-square deviation of M144T with THPCE during the MD simulation.  
(A) M144T in complex with (*S*)-THPCE, (B) M144T in complex with (*R*)-THPCE.

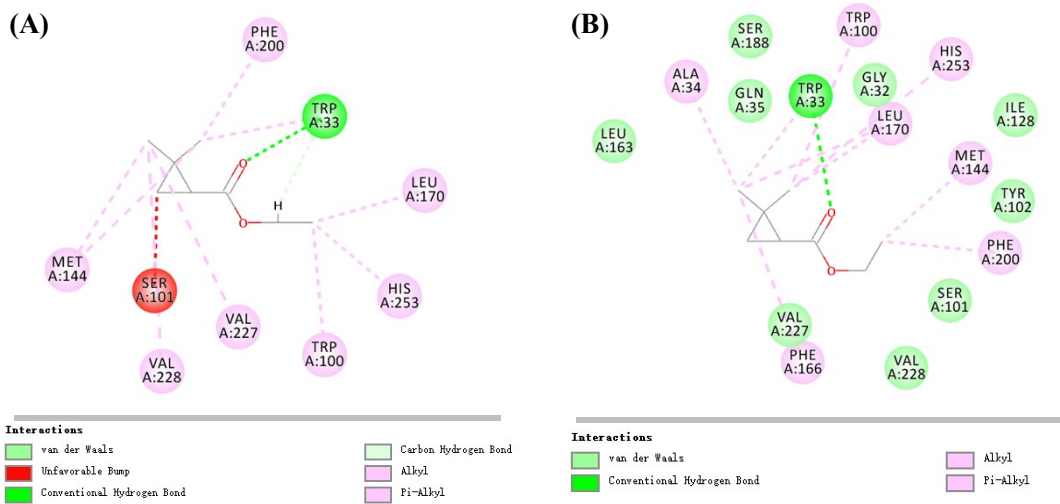

**Fig. S15** Interaction analysis of WT with (*R*)-DMCPE (A) and (*S*)-DMCPE (B).



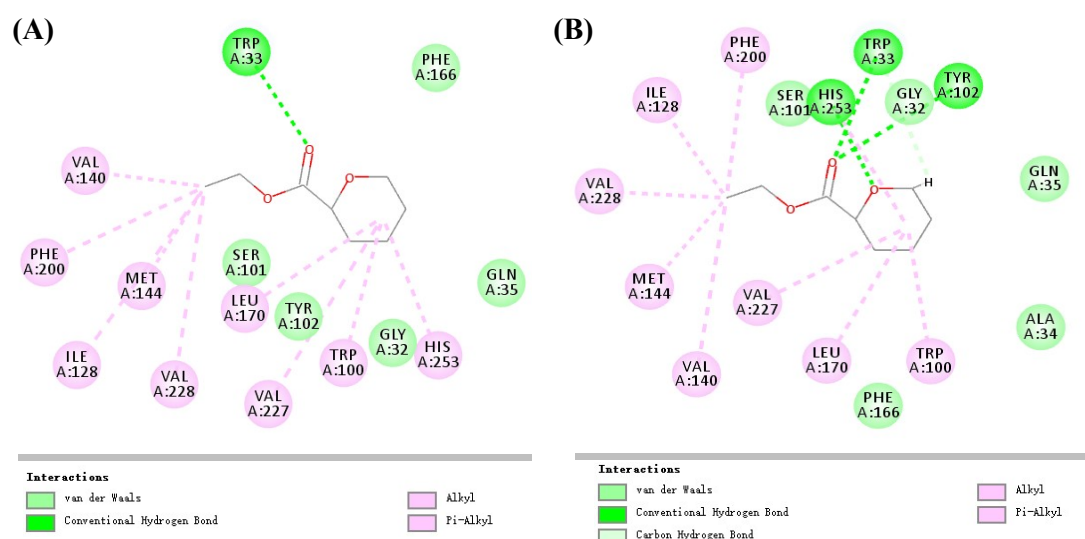

**Fig. S16** Interaction analysis of WT with (*R*)-THPCE (A) and (*S*)-THPCE (B).

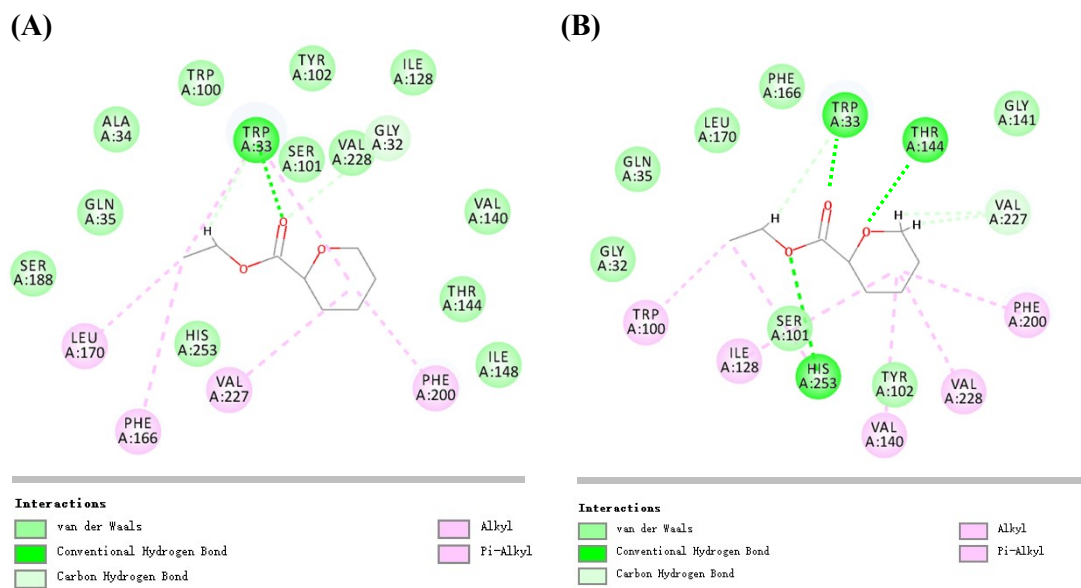

**Fig. S17** Interaction analysis of M144T with (*R*)-THPCE (A) and (*S*)-THPCE (B).
